# Supplementary material for: Comment on ‘Structural characterization, reactivity and vibrational properties of silver clusters: a new global minimum for Ag16’ by P. L. Rodríguez-Kessler, A. R. Rodríguez-Domínguez, D. MacLeod Carey and A. Muñoz-Castro, Phys. Chem. Chem. Phys., 2020, 22, 27255, DOI: D0CP04018E
Source: Royal Society of Chemistry journal article supplement (doi:10.1039/d1cp00646k), 2021-01-01
Supplement: d1cp00646k1.pdf [file d1cp00646k1.pdf]

**Supplementary Information**

**Comment on “Structural characterization, reactivity and vibrational properties of silver clusters: a new global minimum for Ag<sub>16</sub>” by P. L. Rodríguez-Kessler, A. R. Rodríguez-Domínguez, D. MacLeod Carey and A. Muñoz-Castro, Phys. Chem. Chem. Phys., 2020, 22, 27255, DOI: D0CP04018E**

**Pham Vu Nhat,<sup>#</sup> Nguyen Thanh Si,<sup>#</sup> Long Van Duong<sup>‡</sup> and Minh Tho Nguyen<sup>‡,\*</sup>**

*<sup>#</sup> Department of Chemistry, Can Tho University, Can Tho, Vietnam*

*<sup>‡</sup> Institute for Computational Science and Technology (ICST), Ho Chi Minh City, Vietnam*

*Emails: tho.nm@icst.org.vn; minh.nguyen@kuleuven.be*

**Table S1.** Geometries, Cartesian coordinates and total energies of optimized Ag<sub>15</sub> lower-lying isomers (PW91/cc-pVDZ-PP).

| Structure                                                                                                                                    | Cartesian coordinates (angstrom) |              |              | Energy (Hartree) |                                                           |
|----------------------------------------------------------------------------------------------------------------------------------------------|----------------------------------|--------------|--------------|------------------|-----------------------------------------------------------|
| 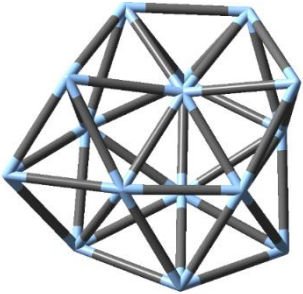<br><b>15-1, C<sub>1</sub>, <sup>2</sup>A</b>               | 47                               | 1.351847000  | 3.120690000  | 0.408251000      | Zero-point correction= 0.008681                           |
|                                                                                                                                              | 47                               | -1.114309000 | -1.055441000 | -2.056970000     | Thermal correction to Energy= 0.040458                    |
|                                                                                                                                              | 47                               | 0.191211000  | 1.258125000  | -1.274935000     | Thermal correction to Enthalpy= 0.041402                  |
|                                                                                                                                              | 47                               | 1.524353000  | -1.175668000 | -1.167923000     | Thermal correction to Gibbs Free Energy= -0.069075        |
|                                                                                                                                              | 47                               | 3.860983000  | -1.064021000 | 0.411598000      | Sum of electronic and zero-point Energies= -2205.876915   |
|                                                                                                                                              | 47                               | 1.660777000  | 0.403667000  | 1.344950000      | Sum of electronic and thermal Energies= -2205.845138      |
|                                                                                                                                              | 47                               | -0.706917000 | -0.989192000 | 0.854417000      | Sum of electronic and thermal Enthalpies= -2205.844194    |
|                                                                                                                                              | 47                               | 1.638842000  | -2.528762000 | 1.218002000      | Sum of electronic and thermal Free Energies= -2205.954671 |
|                                                                                                                                              | 47                               | -0.848666000 | 1.678195000  | 1.453276000      |                                                           |
|                                                                                                                                              | 47                               | -0.501995000 | -3.351984000 | -0.477939000     |                                                           |
|                                                                                                                                              | 47                               | -3.062317000 | -1.941694000 | -0.283989000     |                                                           |
|                                                                                                                                              | 47                               | 3.006819000  | 1.253101000  | -0.946636000     |                                                           |
|                                                                                                                                              | 47                               | -2.558738000 | 0.928873000  | -0.718499000     |                                                           |
|                                                                                                                                              | 47                               | -3.110757000 | -0.030944000 | 1.830357000      |                                                           |
| 47                                                                                                                                           | -1.331132000                     | 3.495057000  | -0.593959000 |                  |                                                           |
| <br><b>15-2, C<sub>2v</sub>, <sup>2</sup>B<sub>1</sub></b> | 47                               | 0.000000000  | 3.772961000  | -0.102661000     | Zero-point correction= 0.008883                           |
|                                                                                                                                              | 47                               | 1.436131000  | -1.390156000 | -0.338879000     | Thermal correction to Energy= 0.040480                    |
|                                                                                                                                              | 47                               | 1.436131000  | 1.390156000  | -0.338879000     | Thermal correction to Enthalpy=0.041424                   |
|                                                                                                                                              | 47                               | 1.906206000  | 0.000000000  | 2.015745000      | Thermal correction to Gibbs Free Energy= -0.067263        |
|                                                                                                                                              | 47                               | 0.000000000  | 2.048371000  | 2.087309000      | Sum of electronic and zero-point Energies= -2205.876625   |
|                                                                                                                                              | 47                               | 1.393033000  | 0.000000000  | -2.765229000     | Sum of electronic and thermal Energies= -2205.845028      |
|                                                                                                                                              | 47                               | -1.436131000 | 1.390156000  | -0.338879000     | Sum of electronic and thermal Enthalpies= -2205.844084    |
|                                                                                                                                              | 47                               | -1.436131000 | -1.390156000 | -0.338879000     | Sum of electronic and thermal Free Energies= -2205.952771 |
|                                                                                                                                              | 47                               | -1.906206000 | 0.000000000  | 2.015745000      |                                                           |
|                                                                                                                                              | 47                               | -1.393033000 | 0.000000000  | -2.765229000     |                                                           |
|                                                                                                                                              | 47                               | 0.000000000  | 2.445841000  | -2.573068000     |                                                           |
|                                                                                                                                              | 47                               | 0.000000000  | -2.445841000 | -2.573068000     |                                                           |
|                                                                                                                                              | 47                               | 0.000000000  | -2.048371000 | 2.087309000      |                                                           |
|                                                                                                                                              | 47                               | 0.000000000  | 0.000000000  | 4.031324000      |                                                           |
| 47                                                                                                                                           | 0.000000000                      | -3.772961000 | -0.102661000 |                  |                                                           |

|                                                                                                                                     |                                                                                                                                                                                                                                                                                                                                                                                                                                                                                                                                                                                                                                                                         |                                                                                                                                                                                                                                                                                                                                                                                                                       |
|-------------------------------------------------------------------------------------------------------------------------------------|-------------------------------------------------------------------------------------------------------------------------------------------------------------------------------------------------------------------------------------------------------------------------------------------------------------------------------------------------------------------------------------------------------------------------------------------------------------------------------------------------------------------------------------------------------------------------------------------------------------------------------------------------------------------------|-----------------------------------------------------------------------------------------------------------------------------------------------------------------------------------------------------------------------------------------------------------------------------------------------------------------------------------------------------------------------------------------------------------------------|
| 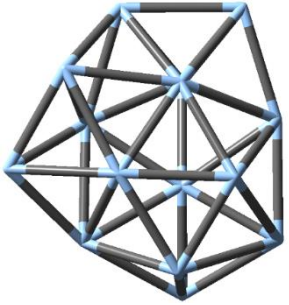 <p><b>15-3, C<sub>1</sub>, <sup>2</sup>A</b></p>  | 47 -0.376265000 1.466385000 1.404506000<br>47 3.585201000 0.212948000 -0.586008000<br>47 1.535487000 -1.223902000 -1.784044000<br>47 -0.956880000 -0.529815000 -0.848556000<br>47 0.978646000 1.428725000 -1.255953000<br>47 1.525376000 -0.541629000 1.056984000<br>47 -0.985895000 -1.205949000 2.031232000<br>47 3.042052000 -2.631205000 0.069661000<br>47 0.202173000 -2.932044000 0.110092000<br>47 0.222937000 3.812586000 0.004400000<br>47 2.360223000 2.203400000 1.004081000<br>47 -1.865226000 2.118812000 -0.889563000<br>47 -2.688502000 -2.404257000 0.123607000<br>47 -2.984180000 0.403819000 1.081697000<br>47 -3.595148000 -0.177874000 -1.522137000 | Zero-point correction= 0.008649<br>Thermal correction to Energy= 0.040455<br>Thermal correction to Enthalpy= 0.041399<br>Thermal correction to Gibbs Free Energy= -0.069217<br>Sum of electronic and zero-point Energies= -2205.875253<br>Sum of electronic and thermal Energies= -2205.843448<br>Sum of electronic and thermal Enthalpies= -2205.842504<br>Sum of electronic and thermal Free Energies= -2205.953119 |
|  <p><b>15-4, C<sub>s</sub>, <sup>2</sup>A'</b></p> | 47 0.145251000 1.630084000 2.376304000<br>47 1.559920000 1.320603000 0.000000000<br>47 -2.106757000 -0.102895000 2.338979000<br>47 -1.882618000 -1.643067000 0.000000000<br>47 0.441537000 -1.151724000 -1.369232000<br>47 0.441537000 -1.151724000 1.369232000<br>47 -1.238077000 1.225824000 0.000000000<br>47 0.145251000 1.630084000 -2.376304000<br>47 -3.839763000 0.300079000 0.000000000<br>47 -2.106757000 -0.102895000 -2.338979000<br>47 2.560291000 0.170375000 2.540022000<br>47 0.170573000 -0.639333000 4.016061000<br>47 2.978749000 -1.016451000 0.000000000<br>47 0.170573000 -0.639333000 -4.016061000<br>47 2.560291000 0.170375000 -2.540022000    | Zero-point correction= 0.008620<br>Thermal correction to Energy= 0.040455<br>Thermal correction to Enthalpy= 0.041400<br>Thermal correction to Gibbs Free Energy= -0.069506<br>Sum of electronic and zero-point Energies= -2205.873827<br>Sum of electronic and thermal Energies= -2205.841992<br>Sum of electronic and thermal Enthalpies= -2205.841047<br>Sum of electronic and thermal Free Energies= -2205.951953 |

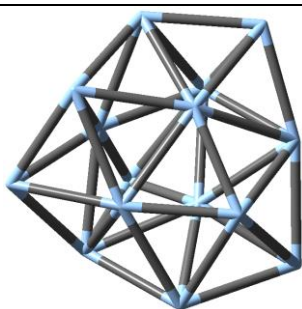

15-5,  $C_1$ ,  $^2A$

|    |              |              |              |                                                           |
|----|--------------|--------------|--------------|-----------------------------------------------------------|
| 47 | -2.427943000 | -1.593925000 | 0.874273000  | Zero-point correction= 0.008570                           |
| 47 | 3.440274000  | 1.745939000  | -0.072146000 | Thermal correction to Energy= 0.040450                    |
| 47 | -2.016334000 | 3.304336000  | 0.062780000  | Thermal correction to Enthalpy= 0.041394                  |
| 47 | 0.855381000  | 2.872016000  | -0.015728000 | Thermal correction to Gibbs Free Energy= -0.069862        |
| 47 | 3.244886000  | -1.087500000 | 0.144662000  | Sum of electronic and zero-point Energies= -2205.867994   |
| 47 | -0.971032000 | 0.874309000  | 0.808137000  | Sum of electronic and thermal Energies= -2205.836114      |
| 47 | 0.475309000  | -1.695609000 | 0.868270000  | Sum of electronic and thermal Enthalpies= -2205.835170    |
| 47 | -1.094775000 | -1.035527000 | -1.539461000 | Sum of electronic and thermal Free Energies= -2205.946426 |
| 47 | -0.902511000 | 1.694611000  | -1.893831000 |                                                           |
| 47 | 1.635280000  | 0.683127000  | 1.729926000  |                                                           |
| 47 | 1.400401000  | 0.344192000  | -1.316329000 |                                                           |
| 47 | 1.443095000  | -2.499051000 | -1.508650000 |                                                           |
| 47 | -3.269968000 | 0.689769000  | -0.658167000 |                                                           |
| 47 | -0.811320000 | -0.676389000 | 3.043607000  |                                                           |
| 47 | -1.000744000 | -3.620297000 | -0.527343000 |                                                           |

**Table S2.** Some representative bond distances (angstrom) and angles (degree) in low-lying Ag<sub>15</sub> isomers computed with different functionals.

A comparison with previous calculated results by Rodríguez-Kessler *et al.* (15-1 - 15-4) and by Dixon *et al.* (15-5) shows that these structural parameters are marginally changed with respect to the DFT-functional employed, and comparable to previous calculated results reported in the literature:

P. L. Rodríguez-Kessler, A. R. Rodríguez-Domínguez, D. M. Carey and A. Muñoz-Castro, *Phys. Chem. Chem. Phys.*, 2020, **22**, 27255-27262.  
R. R. Persaud, M. Chen and D. A. Dixon, *J. Phys. Chem. A*, 2020, **124**, 1775-1786.

The variations amount to at most 0.08 Å for bond distances and 2° for bond angles.

| Structure                                                                                                                    | Parameter    | PW91  | PBE   | TPSS  | LC-BLYP | M06   | B3LYP | Previous calculations |
|------------------------------------------------------------------------------------------------------------------------------|--------------|-------|-------|-------|---------|-------|-------|-----------------------|
| 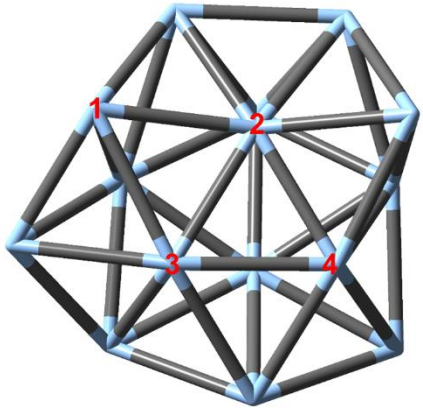 <p>15-1, C<sub>1</sub>, <sup>2</sup>A</p> | Ag1-Ag2      | 2.829 | 2.840 | 2.808 | 2.790   | 2.889 | 2.908 | 2.829                 |
|                                                                                                                              | Ag1-Ag3      | 2.935 | 2.860 | 2.883 | 2.852   | 2.999 | 2.878 | 2.935                 |
|                                                                                                                              | Ag2-Ag4      | 2.737 | 2.777 | 2.718 | 2.716   | 2.791 | 2.814 | 2.737                 |
|                                                                                                                              | Ag3-Ag4      | 2.817 | 2.796 | 2.804 | 2.775   | 2.871 | 2.821 | 2.817                 |
|                                                                                                                              | ∠Ag2-Ag3-Ag4 | 58°   | 59°   | 58°   | 58°     | 58°   | 60°   | 58°                   |

|                                                                                                                                                 |              |       |       |       |       |       |       |       |
|-------------------------------------------------------------------------------------------------------------------------------------------------|--------------|-------|-------|-------|-------|-------|-------|-------|
| 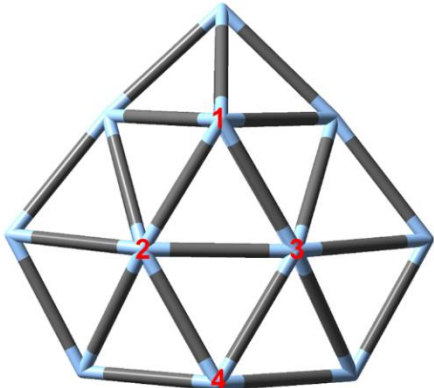 <p><b>15-2, C<sub>2v</sub>, <sup>2</sup>B<sub>1</sub></b></p> | Ag1-Ag2      | 2.774 | 2.779 | 2.755 | 2.760 | 2.824 | 2.817 | 2.802 |
|                                                                                                                                                 | Ag1-Ag3      | 2.774 | 2.779 | 2.755 | 2.760 | 2.824 | 2.817 | 2.802 |
|                                                                                                                                                 | Ag2-Ag4      | 2.797 | 2.801 | 2.769 | 2.751 | 2.852 | 2.848 | 2.792 |
|                                                                                                                                                 | Ag3-Ag4      | 2.797 | 2.801 | 2.769 | 2.751 | 2.852 | 2.848 | 2.792 |
|                                                                                                                                                 | ∠Ag1-Ag2-Ag3 | 60°   | 60°   | 60°   | 60°   | 59°   | 59°   | 60°   |
|  <p><b>15-3, C<sub>1</sub>, <sup>2</sup>A</b></p>             | Ag1-Ag2      | 2.869 | 2.874 | 2.826 | 2.838 | 2.924 | 2.926 | 2.866 |
|                                                                                                                                                 | Ag1-Ag3      | 2.862 | 2.868 | 2.847 | 2.834 | 2.922 | 2.918 | 2.810 |
|                                                                                                                                                 | Ag2-Ag4      | 2.774 | 2.781 | 2.800 | 2.775 | 2.827 | 2.824 | 2.793 |
|                                                                                                                                                 | Ag3-Ag4      | 2.812 | 2.819 | 2.759 | 2.784 | 2.865 | 2.833 | 2.816 |
|                                                                                                                                                 | ∠Ag2-Ag3-Ag4 | 59°   | 59°   | 61°   | 60°   | 59°   | 59°   | 59°   |
|                                                                                                                                                 | Ag1-Ag2      | 2.779 | 2.785 | 2.759 | 2.763 | 2.831 | 2.831 | 2.796 |
|                                                                                                                                                 | Ag1-Ag3      | 2.783 | 2.790 | 2.773 | 2.753 | 2.836 | 2.813 | 2.793 |

|                                                                                                                         |                      |       |       |       |       |       |       |       |
|-------------------------------------------------------------------------------------------------------------------------|----------------------|-------|-------|-------|-------|-------|-------|-------|
| 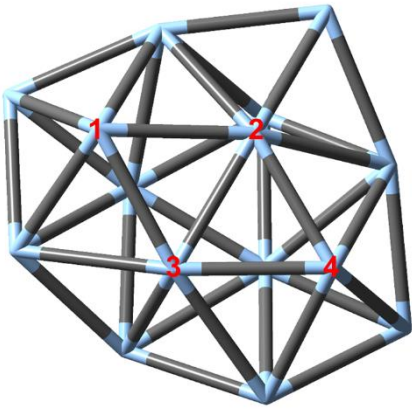 <p>15-4, <math>C_s, {}^2A'</math></p> | Ag2-Ag4              | 2.779 | 2.785 | 2.759 | 2.763 | 2.831 | 2.831 | 2.796 |
|                                                                                                                         | Ag3-Ag4              | 2.783 | 2.790 | 2.773 | 2.753 | 2.836 | 2.813 | 2.793 |
|                                                                                                                         | $\angle Ag2-Ag3-Ag4$ | 59°   | 59°   | 59°   | 59°   | 59°   | 60°   | 60°   |
|  <p>15-5, <math>C_1, {}^2A</math></p> | Ag1-Ag2              | 2.850 | 2.857 | 2.821 | 2.783 | 2.916 | 2.925 | 2.915 |
|                                                                                                                         | Ag1-Ag3              | 2.930 | 2.938 | 2.899 | 2.871 | 2.999 | 3.011 | 2.994 |
|                                                                                                                         | Ag2-Ag4              | 2.731 | 2.737 | 2.720 | 2.737 | 2.783 | 2.764 | 2.754 |
|                                                                                                                         | Ag3-Ag4              | 2.760 | 2.768 | 2.753 | 2.722 | 2.807 | 2.782 | 2.769 |
|                                                                                                                         | $\angle Ag2-Ag3-Ag4$ | 58°   | 58°   | 58°   | 58°   | 57°   | 58°   | 58°   |
